# Supplementary material for: Influence of vitamin D binding protein polymorphism, demographics and lifestyle factors on vitamin D status of healthy Malaysian pregnant women
Source: PubMed Central journal article supplement (PMC7684735; doi:10.1186/s12884-020-03397-7), 2020-11-23
Supplement: 12884_2020_3397_MOESM1_ESM.pdf [file 12884_2020_3397_MOESM1_ESM.pdf]

## Medical records

Date of recruitment:

Subject ID:

| Personal details |                   |               |                                            |  |
|------------------|-------------------|---------------|--------------------------------------------|--|
| 1.               | Age               |               | LMP                                        |  |
| 2.               | Ethnicity         |               | EDD                                        |  |
| 3                | Education level   |               | Gravidity, Parity,<br>Abortion (e.g. G1P0) |  |
| 4                | Occupation        |               | Partner's occupation                       |  |
| 5                | Family H/O        |               | Previous pregnancy                         |  |
| 6.               | Height            |               |                                            |  |
| Booking          |                   | First booking | Last booking                               |  |
| 1                | Date @ week       |               |                                            |  |
| 2                | Weight            |               |                                            |  |
| 3                | Hb                |               |                                            |  |
| 4.               | Ultrasound scan   | CRL:          | BPD:<br>HC:<br>AC:<br>FL:                  |  |
| Deliver          |                   |               |                                            |  |
| 1.               | Date time         |               | Week                                       |  |
| 1                | Birth weight (kg) |               | APGA 1 min                                 |  |
| 2                | Length (cm)       |               | APGA 5 min                                 |  |
| 3                | HC (cm)           |               | MOD                                        |  |
| 4                | sex               |               |                                            |  |

Date: 

|     |       |      |  |  |  |
|-----|-------|------|--|--|--|
|     |       |      |  |  |  |
| Day | Month | Year |  |  |  |

**PART A : Socio demographic characteristic**

|           |                                                                                        |                                                                                                                                                                                                                                                                                                                                                                                                                                                                                                                                                                                                                                        |   |   |       |   |  |  |  |  |
|-----------|----------------------------------------------------------------------------------------|----------------------------------------------------------------------------------------------------------------------------------------------------------------------------------------------------------------------------------------------------------------------------------------------------------------------------------------------------------------------------------------------------------------------------------------------------------------------------------------------------------------------------------------------------------------------------------------------------------------------------------------|---|---|-------|---|--|--|--|--|
| <b>A1</b> | What is your <b><u>date of birth?</u></b><br>(dd/mm/yyyy)                              | <table style="border: none; width: 100%;"> <tr> <td style="border: 1px solid black; width: 20px; height: 20px;"></td> <td style="border: none; width: 10px; text-align: center;">/</td> <td style="border: 1px solid black; width: 20px; height: 20px;"></td> <td style="border: none; width: 10px; text-align: center;">/</td> <td style="border: 1px solid black; width: 20px; height: 20px;"></td> <td style="border: 1px solid black; width: 20px; height: 20px;"></td> <td style="border: 1px solid black; width: 20px; height: 20px;"></td> <td style="border: 1px solid black; width: 20px; height: 20px;"></td> </tr> </table> |   | / |       | / |  |  |  |  |
|           | /                                                                                      |                                                                                                                                                                                                                                                                                                                                                                                                                                                                                                                                                                                                                                        | / |   |       |   |  |  |  |  |
| <b>A2</b> | <b><u>How old</u></b> are you?                                                         | <table style="border: none; width: 100%;"> <tr> <td style="border: 1px solid black; width: 20px; height: 20px;"></td> <td style="border: 1px solid black; width: 20px; height: 20px;"></td> <td style="padding-left: 10px;">years</td> </tr> </table>                                                                                                                                                                                                                                                                                                                                                                                  |   |   | years |   |  |  |  |  |
|           |                                                                                        | years                                                                                                                                                                                                                                                                                                                                                                                                                                                                                                                                                                                                                                  |   |   |       |   |  |  |  |  |
| <b>A3</b> | What is your current <b><u>marital status?</u></b>                                     | <input type="checkbox"/> 1. Single<br><input type="checkbox"/> 2. Married<br><input type="checkbox"/> 3. Divorced<br><input type="checkbox"/> 4. Widowed<br><input type="checkbox"/> 5. Cohabiting                                                                                                                                                                                                                                                                                                                                                                                                                                     |   |   |       |   |  |  |  |  |
| <b>A4</b> | What is your <b><u>ethnic group background?</u></b>                                    | <input type="checkbox"/> 1. Malay<br><input type="checkbox"/> 2. Chinese<br><input type="checkbox"/> 3. Indian<br><input type="checkbox"/> 4. Others (Please state: ..... )                                                                                                                                                                                                                                                                                                                                                                                                                                                            |   |   |       |   |  |  |  |  |
| <b>A5</b> | What is the <b><u>highest level of education</u></b> that you have completed?          | <input type="checkbox"/> 1. No formal schooling<br><input type="checkbox"/> 2. Primary school (1 /2 /3 /4 /5 /6 )<br><input type="checkbox"/> 3. Secondary school (1/2/3/4/5)<br><input type="checkbox"/> 4. Pre-U (STPM, matriculation, diploma.)<br><input type="checkbox"/> 5. University/ College (1/2/3/4/5)<br><input type="checkbox"/> 6. Post graduate degree completed (Master/PhD)                                                                                                                                                                                                                                           |   |   |       |   |  |  |  |  |
| <b>A6</b> | How <b><u>many years of school,</u></b> including higher education have you completed? | <table style="border: none; width: 100%;"> <tr> <td style="border: 1px solid black; width: 20px; height: 20px;"></td> <td style="border: 1px solid black; width: 20px; height: 20px;"></td> <td style="padding-left: 10px;">years</td> </tr> </table>                                                                                                                                                                                                                                                                                                                                                                                  |   |   | years |   |  |  |  |  |
|           |                                                                                        | years                                                                                                                                                                                                                                                                                                                                                                                                                                                                                                                                                                                                                                  |   |   |       |   |  |  |  |  |
| <b>A7</b> | What is your <b><u>current job?</u></b>                                                | <input type="checkbox"/> 1. Not working for pay → <b>Go to question A11</b><br><input type="checkbox"/> 2. Government employee<br><input type="checkbox"/> 3. Non-government employee<br><input type="checkbox"/> 4. Self-employed /Employer                                                                                                                                                                                                                                                                                                                                                                                           |   |   |       |   |  |  |  |  |
| <b>A8</b> | What is your main <b><u>occupation?</u></b>                                            |                                                                                                                                                                                                                                                                                                                                                                                                                                                                                                                                                                                                                                        |   |   |       |   |  |  |  |  |

Date: 

|     |       |  |  |  |  |      |  |
|-----|-------|--|--|--|--|------|--|
|     |       |  |  |  |  |      |  |
| Day | Month |  |  |  |  | Year |  |

|            |                                                                                                 |                                                                                                                                                                                                                                                                                                                                                                                              |
|------------|-------------------------------------------------------------------------------------------------|----------------------------------------------------------------------------------------------------------------------------------------------------------------------------------------------------------------------------------------------------------------------------------------------------------------------------------------------------------------------------------------------|
| <b>A9</b>  | <b>Where</b> do you spent most of your working time ?                                           | <input type="checkbox"/> 1. Indoor<br><input type="checkbox"/> 2. Outdoor<br><input type="checkbox"/> 3. Both                                                                                                                                                                                                                                                                                |
| <b>A10</b> | What is your <b>monthly income</b> ?                                                            | <input type="checkbox"/> RM0-1500<br><input type="checkbox"/> RM1501-3000<br><input type="checkbox"/> RM3001-5000<br><input type="checkbox"/> RM5001-8000<br><input type="checkbox"/> RM8001 and above                                                                                                                                                                                       |
| <b>A11</b> | What is the main <b>reason</b> you are not working for pay?<br><i>(Skip if you are working)</i> | <input type="checkbox"/> 1. Homemaker/ caring for family<br><input type="checkbox"/> 2. Looked but can't find a job<br><input type="checkbox"/> 3. Doing unpaid work/ voluntary activities<br><input type="checkbox"/> 4. Studies/training<br><input type="checkbox"/> 5. Retired<br><input type="checkbox"/> 6. Ill health<br><input type="checkbox"/> 7. Others (Please state:.....)       |
| <b>A12</b> | What is your husband/ partner's <b>ethnic group background</b> ?                                | <input type="checkbox"/> 1. Malay<br><input type="checkbox"/> 2. Chinese<br><input type="checkbox"/> 3. Indian<br><input type="checkbox"/> 4. Others (Please state:..... )                                                                                                                                                                                                                   |
| <b>A13</b> | What is the <b>Highest level of education</b> that your husband/ partner have completed?        | <input type="checkbox"/> 1. No formal schooling<br><input type="checkbox"/> 2. Primary school (1 /2 /3 /4 /5 /6 )<br><input type="checkbox"/> 3. Secondary school (1/2/3/4/5)<br><input type="checkbox"/> 4. Pre-U (STPM, matriculation, diploma.)<br><input type="checkbox"/> 5. University/ College (1/2/3/4/5)<br><input type="checkbox"/> 6. Post graduate degree completed (Master/PhD) |

Date: 

|     |       |  |  |  |  |      |
|-----|-------|--|--|--|--|------|
|     |       |  |  |  |  |      |
| Day | Month |  |  |  |  | Year |

|            |                                                                                                                                          |                                                                                                                                                                                                                                                |
|------------|------------------------------------------------------------------------------------------------------------------------------------------|------------------------------------------------------------------------------------------------------------------------------------------------------------------------------------------------------------------------------------------------|
| <b>A14</b> | What is your <b>husband/ partner current job?</b>                                                                                        | <input type="checkbox"/> 1. Not working for pay<br><input type="checkbox"/> 2. Government employee<br><input type="checkbox"/> 3. Non-government employee<br><input type="checkbox"/> 4. Self-employed<br><input type="checkbox"/> 5. Employer |
| <b>A15</b> | What is your <b>husband/partner main occupation?</b>                                                                                     |                                                                                                                                                                                                                                                |
| <b>A16</b> | What is your <b>husband/partner monthly income?</b>                                                                                      | <input type="checkbox"/> RM0-1500<br><input type="checkbox"/> RM1501-3000<br><input type="checkbox"/> RM3001-5000<br><input type="checkbox"/> RM5001-8000<br><input type="checkbox"/> RM8001 and above                                         |
| <b>A17</b> | What is your <b>total household income</b> (including your income and the income of your husband/partner and income from other sources)? | <input type="checkbox"/> RM0-1500<br><input type="checkbox"/> RM1501-3000<br><input type="checkbox"/> RM3001-5000<br><input type="checkbox"/> RM5001-8000<br><input type="checkbox"/> RM8001 and above                                         |

**PART B: Pregnancy history and details**

|            |                                                                                                                               |                                                                   |
|------------|-------------------------------------------------------------------------------------------------------------------------------|-------------------------------------------------------------------|
| <b>B01</b> | Regardless of the pregnancy outcome, <b>how many times</b> you have been pregnant?<br><i>(include your current pregnancy)</i> | ..... Times                                                       |
| <b>B02</b> | <b>How many times</b> you have given birth to a live baby?                                                                    | ..... Times                                                       |
| <b>B03</b> | Did you ever give birth to a baby that weighed <b>less than 2.5kg</b> (5lbs, 8ozs)?                                           | <input type="checkbox"/> 1. Yes<br><input type="checkbox"/> 2. No |

Date: 

|     |       |      |  |  |  |
|-----|-------|------|--|--|--|
|     |       |      |  |  |  |
| Day | Month | Year |  |  |  |

|            |                                                                                                                                                                   |                                                                                                                                                                                                                                                                                                                                                    |
|------------|-------------------------------------------------------------------------------------------------------------------------------------------------------------------|----------------------------------------------------------------------------------------------------------------------------------------------------------------------------------------------------------------------------------------------------------------------------------------------------------------------------------------------------|
| <b>B04</b> | Did you ever have a baby that was born <b>prematurely</b> (before you completed 37 weeks of pregnancy)                                                            | <input type="checkbox"/> 1. Yes<br><input type="checkbox"/> 2. No                                                                                                                                                                                                                                                                                  |
| <b>B05</b> | How many times you have <b>abortion</b> ?<br><i>(Include both induced and spontaneous abortion)</i>                                                               | ..... Times                                                                                                                                                                                                                                                                                                                                        |
| <b>B06</b> | At what <b>age</b> did you <b>get your first pregnancy</b> ?                                                                                                      | ..... Years old                                                                                                                                                                                                                                                                                                                                    |
| <b>B07</b> | Just <b>before you got pregnant</b> , how much did you <b>weigh</b> ?                                                                                             | ..... Kilograms                                                                                                                                                                                                                                                                                                                                    |
| <b>B08</b> | About how much do you <b>weigh right now</b> ?                                                                                                                    | ..... Kilograms                                                                                                                                                                                                                                                                                                                                    |
| <b>B09</b> | How <b>tall</b> are you without shoes?                                                                                                                            | ..... cm                                                                                                                                                                                                                                                                                                                                           |
| <b>B10</b> | <b>Before you got pregnant</b> , did a doctor, nurse or other health care worker ever tell you that you had any of the following <b>health condition</b> ?        | <input type="checkbox"/> No<br><input type="checkbox"/> Diabetes (High blood glucose)<br><input type="checkbox"/> Hypertension (High blood pressure)<br><input type="checkbox"/> Cardiovascular disease<br><input type="checkbox"/> Renal disease<br><input type="checkbox"/> Others (Please state: .....).                                        |
| <b>B11</b> | During your <b>current pregnancy</b> , did a doctor, nurse or other health care worker ever tell you that you had any of the following <b>health conditions</b> ? | <input type="checkbox"/> No<br><input type="checkbox"/> Gestational Diabetes<br><input type="checkbox"/> Pre-eclampsia<br><input type="checkbox"/> Eclampsia<br><input type="checkbox"/> Anemia<br><input type="checkbox"/> Endometriosis<br><input type="checkbox"/> Placenta Abruption<br><input type="checkbox"/> Others (Please state: .....). |

Date: 

|     |       |      |  |  |  |
|-----|-------|------|--|--|--|
|     |       |      |  |  |  |
| Day | Month | Year |  |  |  |

**PART C: Smoking**

|            |                                                                                                                                                 |                                                                                                                                                                    |
|------------|-------------------------------------------------------------------------------------------------------------------------------------------------|--------------------------------------------------------------------------------------------------------------------------------------------------------------------|
| <b>C01</b> | Are you a smoker?                                                                                                                               | <input type="checkbox"/> 1. No. (skip PART C)<br><input type="checkbox"/> 2. Yes, I was a former smoker.<br><input type="checkbox"/> 3. Yes, i am currently smoke. |
| <b>C02</b> | Have you smoked any cigarettes in the past 2 years?                                                                                             | <input type="checkbox"/> 1. Yes<br><input type="checkbox"/> 2. No                                                                                                  |
| <b>C03</b> | During the 3 months before you got pregnant, how many cigarettes did you smoke on an average day?                                               | ..... sticks                                                                                                                                                       |
| <b>C04</b> | During the first 3 months of your pregnancy (including before you knew you were pregnant), how many cigarettes did you smoke on an average day? | ..... sticks                                                                                                                                                       |
| <b>C05</b> | How many cigarettes do you smoke on an average day now?                                                                                         | ..... sticks                                                                                                                                                       |

**PART D: Skin Typing**

Please fill out the questionnaire similar to this example:

- If the colour of your eyes are dark brown, then mark the answer as shown below.

| Score                             | 0                       | 1                   | 2    | 3          | 4              |
|-----------------------------------|-------------------------|---------------------|------|------------|----------------|
| What are the colour of your eyes? | Light blue, gray, green | Blue, gray or green | Blue | Dark brown | Brownish black |

**D01. Genetic Disposition**

| Score     |                                                     | 0                       | 1                   | 2                        | 3           | 4              |
|-----------|-----------------------------------------------------|-------------------------|---------------------|--------------------------|-------------|----------------|
| <b>a.</b> | What are the colour of your eyes?                   | Light blue, gray, green | Blue, gray or green | Blue                     | Dark brown  | Brownish black |
| <b>b.</b> | What is the natural colour of your hair?            | Sandy red               | Blond               | Chestnut/<br>Dark, blond | Dark brown  | Black          |
| <b>c.</b> | What is the color of your skin (non exposed areas)? | Reddish                 | Very pale           | Pale with beige tint     | Light brown | Dark brown     |
| <b>d.</b> | Did you have freckles on unexposed areas?           | Many                    | Several             | Few                      | Incidental  | None           |

Date: 

|     |       |      |  |  |  |
|-----|-------|------|--|--|--|
|     |       |      |  |  |  |
| Day | Month | Year |  |  |  |

**D02. Reaction to Sun Exposure**

|    | Score                                                      | 0                                    | 1                              | 2                                   | 3              | 4                       |
|----|------------------------------------------------------------|--------------------------------------|--------------------------------|-------------------------------------|----------------|-------------------------|
| a. | What happens when you stay in the sun too long?            | Painful redness, blistering, peeling | Blistering followed by peeling | Burns sometimes followed by peeling | Rare burns     | Never had burns         |
| b. | To what degree do you turn brown?                          | Hardly or not at all                 | Light colour tan               | Reasonable tan                      | Tan very easy  | Turn dark brown quickly |
| c. | Do you turn brown within several hours after sun exposure? | Never                                | Seldom                         | Sometimes                           | Often          | Always                  |
| d. | How does your face react to the sun?                       | Very sensitive                       | Sensitive                      | Normal                              | Very resistant | Never had a problem     |

**D03. Tanning Habits**

|    | Score                                                                            | 0                      | 1              | 2              | 3                     | 4                     |
|----|----------------------------------------------------------------------------------|------------------------|----------------|----------------|-----------------------|-----------------------|
| a. | When did you last expose your body to sun (or artificial sunlamp/tanning cream)? | More than 3 months ago | 2-3 months ago | 1-2 months ago | Less than a month ago | Less than 2 weeks ago |
| b. | Did you expose the area to be treated to the sun?                                | Never                  | Hardly ever    | Sometimes      | Often                 | Always                |

Date: 

|     |  |       |  |      |  |  |  |
|-----|--|-------|--|------|--|--|--|
|     |  |       |  |      |  |  |  |
| Day |  | Month |  | Year |  |  |  |

## PART E: Sun Exposure Log

### Instructions:

- 1) Record how long you were outdoors during each time period if it is **greater than 5 mins.**  
- For example: If you were outside from 1:33pm to 1:55pm, note 22 mins. in the time period from 1pm-2pm.
- 2) Record your outdoor activity next to the appropriate time period.  
-For example: walk, bike, run, sit, stand, swim, garden
- 3) Record which parts of your body were exposed to the sun or covered with sunscreen using the key provided. (Please refer to the attached clothing key)
- 4) Record your sun exposure frequency (per week) and fill out the form similar to this **example**:

| Time of day | Outdoor activity | Time spent outdoors (minutes) | Frequency | Are you using? |          | Clothing |   |   |   | Sunscreen |   |   |   | SPF |    |
|-------------|------------------|-------------------------------|-----------|----------------|----------|----------|---|---|---|-----------|---|---|---|-----|----|
|             |                  |                               |           | Glove          | Umbrella | A        | B | C | D | A         | B | C | D |     |    |
| 7am-8am     | Jogging          | 40                            | 5/7       |                |          | 1        | 3 | 4 | 3 | ✓         |   |   |   |     | 15 |
| 8am-9am     | Walking          | 10                            | 7/7       |                | ✓        | 1        | 4 | 3 | 2 |           |   |   |   |     |    |

| Time of day | Outdoor activity | Time spent outdoors (minutes) | Frequency | Are you using? |          | Clothing |   |   |   | Sunscreen |   |   |   | SPF |  |
|-------------|------------------|-------------------------------|-----------|----------------|----------|----------|---|---|---|-----------|---|---|---|-----|--|
|             |                  |                               |           | Glove          | Umbrella | A        | B | C | D | A         | B | C | D |     |  |
| 7am-8am     |                  |                               |           |                |          |          |   |   |   |           |   |   |   |     |  |
| 8am-9am     |                  |                               |           |                |          |          |   |   |   |           |   |   |   |     |  |
| 9am-10am    |                  |                               |           |                |          |          |   |   |   |           |   |   |   |     |  |
| 10am-11am   |                  |                               |           |                |          |          |   |   |   |           |   |   |   |     |  |
| 11am-12pm   |                  |                               |           |                |          |          |   |   |   |           |   |   |   |     |  |
| 12pm-1pm    |                  |                               |           |                |          |          |   |   |   |           |   |   |   |     |  |
| 1pm-2pm     |                  |                               |           |                |          |          |   |   |   |           |   |   |   |     |  |
| 2pm-3pm     |                  |                               |           |                |          |          |   |   |   |           |   |   |   |     |  |
| 3pm-4pm     |                  |                               |           |                |          |          |   |   |   |           |   |   |   |     |  |
| 4pm-5pm     |                  |                               |           |                |          |          |   |   |   |           |   |   |   |     |  |
| 5pm-6pm     |                  |                               |           |                |          |          |   |   |   |           |   |   |   |     |  |
| 6pm-7pm     |                  |                               |           |                |          |          |   |   |   |           |   |   |   |     |  |



**PART F: Food frequency questionnaire**

|                          | Food item                                                             |              | Name of brand/product | Frequency of intake  |                       |                        |                        | Serving size            | Total serving every meal |
|--------------------------|-----------------------------------------------------------------------|--------------|-----------------------|----------------------|-----------------------|------------------------|------------------------|-------------------------|--------------------------|
|                          |                                                                       |              |                       | How many times a day | How many times a week | How many times a month | Never @ < once a month |                         |                          |
| <b>A. Fortified food</b> |                                                                       |              |                       |                      |                       |                        |                        |                         |                          |
| 1.                       | Milk powder                                                           | Full cream   |                       |                      |                       |                        |                        | Tablespoon<br>Scoop     |                          |
|                          |                                                                       | Low fat      |                       |                      |                       |                        |                        | Tablespoon<br>Scoop     |                          |
|                          |                                                                       | Skim         |                       |                      |                       |                        |                        | Tablespoon<br>Scoop     |                          |
| 2.                       | Prenatal milk                                                         |              |                       |                      |                       |                        |                        | Tablespoon<br>Scoop     |                          |
| 3.                       | Fresh milk                                                            | Full cream   |                       |                      |                       |                        |                        | Box S/L<br>Cup/ Glass   |                          |
|                          |                                                                       | Rendah lemak |                       |                      |                       |                        |                        | Box S/L<br>Cup/ Glass   |                          |
|                          |                                                                       | Low fat      |                       |                      |                       |                        |                        | Box S/L<br>Cup/ Glass   |                          |
| 4.                       | UHT milk                                                              |              |                       |                      |                       |                        |                        | Box<br>S/L              |                          |
| 5.                       | Sterilized milk                                                       |              |                       |                      |                       |                        |                        | Cup/ Glass              |                          |
| 6.                       | Sweetened condensed milk ( <i>in tea, coffee or other beverages</i> ) |              |                       |                      |                       |                        |                        | Tablespoon/<br>teaspoon |                          |
| 7.                       | Evaporated milk ( <i>in tea, coffee or other beverages</i> )          |              |                       |                      |                       |                        |                        | Tablespoon/<br>teaspoon |                          |
| 8.                       | Malt milk powder                                                      |              |                       |                      |                       |                        |                        | Tablespoon              |                          |
| 9.                       | Milk with cereal (3 in 1)                                             |              |                       |                      |                       |                        |                        | Tablespoon/<br>pack     |                          |
| 10.                      | Cereal without milk                                                   |              |                       |                      |                       |                        |                        | Tablespoon              |                          |
| 11.                      | Soy drink                                                             |              |                       |                      |                       |                        |                        | Box S/L<br>Cup/ Glass   |                          |
| 12.                      | Glucose drink fortified with vitamin D                                |              |                       |                      |                       |                        |                        | Tablespoon              |                          |
| 13.                      | Yogurt (milk or soy)                                                  |              |                       |                      |                       |                        |                        | Cup<br>Container        |                          |
| 14.                      | Cultured milk                                                         |              |                       |                      |                       |                        |                        | Bottle                  |                          |

|    | Food item                                | Name of brand/product | Frequency of intake  |                       |                        |                        | Serving size            | Total serving every meal |
|----|------------------------------------------|-----------------------|----------------------|-----------------------|------------------------|------------------------|-------------------------|--------------------------|
|    |                                          |                       | How many times a day | How many times a week | How many times a month | Never @ < once a month |                         |                          |
| 15 | Cheese                                   |                       |                      |                       |                        |                        | Piece<br>cup            |                          |
| 16 | Biscuit                                  |                       |                      |                       |                        |                        | Piece<br>Packet         |                          |
| 17 | Margarine (in any food eaten)            |                       |                      |                       |                        |                        | Teaspoon/<br>Tablespoon |                          |
| 18 | Butter (in any food eaten)               |                       |                      |                       |                        |                        | Teaspoon/<br>Tablespoon |                          |
| 19 | Bread                                    |                       |                      |                       |                        |                        | Piece                   |                          |
| 20 | Homemade ice cream made from milk        |                       |                      |                       |                        |                        | Cup<br>scoop            |                          |
| 21 | Milk dessert (pudding @ custard)         |                       |                      |                       |                        |                        | Cup<br>scoop            |                          |
| 22 | Waffle                                   |                       |                      |                       |                        |                        | Piece                   |                          |
| 23 | Pancake                                  |                       |                      |                       |                        |                        | Piece                   |                          |
| 24 | Potatoes; mashed with milk and margarine |                       |                      |                       |                        |                        | Cup                     |                          |
| 25 | Lasagna, spaghetti with cheese           |                       |                      |                       |                        |                        | Cup                     |                          |
| 26 | Cream soup/<br>mushroom<br>soup          | Canned                |                      |                       |                        |                        | Cup                     |                          |
|    |                                          | Instant               |                      |                       |                        |                        | Pack                    |                          |

|          | Type of food and drink                                     | Frequency of intake  |                       |                        |                        | Serving size        | Total serving every meal |
|----------|------------------------------------------------------------|----------------------|-----------------------|------------------------|------------------------|---------------------|--------------------------|
|          |                                                            | How many times a day | How many times a week | How many times a month | Never @ < once a month |                     |                          |
| <b>B</b> | <b>Natural Food (Seafood/ meat/ egg product/ mushroom)</b> |                      |                       |                        |                        |                     |                          |
| 1.       | Canned mackerel                                            |                      |                       |                        |                        | <i>piece</i>        |                          |
| 2.       | Canned sardines                                            |                      |                       |                        |                        | <i>piece</i>        |                          |
| 3.       | Fresh sardines                                             |                      |                       |                        |                        |                     |                          |
| 4.       | Canned Tuna                                                |                      |                       |                        |                        | <i>piece</i>        |                          |
| 5.       | Salmon                                                     |                      |                       |                        |                        | <i>piece</i>        |                          |
| 6.       | Ikan kembong, Mackerel                                     |                      |                       |                        |                        | <i>piece</i>        |                          |
| 7.       | Ikan keli/ catfish                                         |                      |                       |                        |                        | <i>piece/ slice</i> |                          |
| 8.       | Tamban bulat, <i>Herring, round</i>                        |                      |                       |                        |                        | <i>piece/ slice</i> |                          |
| 9.       | Ikan Cencaru,/ <i>Scad hardtail</i>                        |                      |                       |                        |                        | <i>piece/ slice</i> |                          |
| 10.      | Ikan selar bulat/ <i>Big eye scad</i>                      |                      |                       |                        |                        | <i>piece/ slice</i> |                          |
| 11.      | Ikan selar kuning/ <i>scad yellowtail</i>                  |                      |                       |                        |                        | <i>piece/ slice</i> |                          |
| 12.      | Ikan selar/ <i>spotted travelley</i>                       |                      |                       |                        |                        | <i>piece/ slice</i> |                          |
| 13.      | Ikan ekor kuning/ <i>Yellowtail</i>                        |                      |                       |                        |                        | <i>piece/ slice</i> |                          |
| 14.      | Kerapu merah/ red grouper                                  |                      |                       |                        |                        | <i>piece/ slice</i> |                          |
| 15.      | Ikan bawal putih/ white promfret                           |                      |                       |                        |                        | <i>piece/ slice</i> |                          |
| 16.      | Ikan bawal hitam/ black promfret                           |                      |                       |                        |                        | <i>piece/ slice</i> |                          |
| 17.      | Ikan belanak/ Mullet bluetail                              |                      |                       |                        |                        | <i>piece/ slice</i> |                          |
| 18.      | Ikan puyu/ Perch, climbing                                 |                      |                       |                        |                        | <i>piece/ slice</i> |                          |
| 19.      | Ikan tenggiri papan/ Mackerel spanish                      |                      |                       |                        |                        | <i>piece/ slice</i> |                          |
| 20.      | Ikan tongkol                                               |                      |                       |                        |                        | <i>piece/ slice</i> |                          |
| 21.      | Ikan Lee Koh/ Carp common                                  |                      |                       |                        |                        | <i>piece/ slice</i> |                          |
| 22.      | Ikan parang/ Herring wolf                                  |                      |                       |                        |                        | <i>piece/ slice</i> |                          |
| 23.      | Ikan kerapu, Grouper                                       |                      |                       |                        |                        | <i>piece/ slice</i> |                          |
| 24.      | Cod                                                        |                      |                       |                        |                        | <i>piece/ slice</i> |                          |
| 25.      | Ikan jenahak/ white snapper                                |                      |                       |                        |                        | <i>piece/ slice</i> |                          |
| 26.      | Ikan siakap/ Perch gain sea                                |                      |                       |                        |                        | <i>piece/ slice</i> |                          |
| 27.      | Other fish: if any                                         |                      |                       |                        |                        | <i>piece/ slice</i> |                          |
| 28.      | Ikan bilis/ anchovies                                      |                      |                       |                        |                        | Cup                 |                          |
| 29.      | Udang/ <i>prawn</i>                                        |                      |                       |                        |                        | Piece               |                          |
| 30.      | Udang kecil/ shrimp                                        |                      |                       |                        |                        | Tablespoon          |                          |
| 31.      | Kerang/ clam                                               |                      |                       |                        |                        | Tablespoon          |                          |
| 32.      | Seafood others                                             |                      |                       |                        |                        |                     |                          |

|    | Type of food and drink                              |                | Frequency of intake  |                       |                        |                        | Serving size | Total serving every meal |
|----|-----------------------------------------------------|----------------|----------------------|-----------------------|------------------------|------------------------|--------------|--------------------------|
|    |                                                     |                | How many times a day | How many times a week | How many times a month | Never @ < once a month |              |                          |
| B  | Natural Food (Seafood/ meat/ egg product/ mushroom) |                |                      |                       |                        |                        |              |                          |
| 33 | Chicken                                             | With skin      |                      |                       |                        |                        | Piece        |                          |
|    |                                                     | Without skin   |                      |                       |                        |                        | Piece        |                          |
| 34 | Beef                                                | With skin      |                      |                       |                        |                        | Box          |                          |
|    |                                                     | Without skin   |                      |                       |                        |                        | Box          |                          |
| 35 | Pork/ Mutton                                        | With skin      |                      |                       |                        |                        | Box          |                          |
|    |                                                     | Without skin   |                      |                       |                        |                        | Box          |                          |
| 36 | Beef sausage/ frankfurter                           |                |                      |                       |                        |                        | Piece        |                          |
| 37 | Pork/ Chicken sausage/ frankfurter                  |                |                      |                       |                        |                        | Piece        |                          |
| 38 | Ham/ luncheon meat                                  |                |                      |                       |                        |                        | Piece        |                          |
| 39 | Internal organ                                      | Liver          |                      |                       |                        |                        | Piece        |                          |
|    |                                                     | Kidney         |                      |                       |                        |                        | Piece        |                          |
|    |                                                     | Lung           |                      |                       |                        |                        | Piece        |                          |
| 40 | Eggs: eaten alone or in foods                       | Egg white only |                      |                       |                        |                        | Piece        |                          |
|    |                                                     | Egg yolk only  |                      |                       |                        |                        | Piece        |                          |
|    |                                                     | Whole          |                      |                       |                        |                        | Piece        |                          |
| 41 | Mushroom                                            | Fresh          |                      |                       |                        |                        | Cup          |                          |
|    |                                                     | Dried          |                      |                       |                        |                        | Cup          |                          |
|    |                                                     | Canned         |                      |                       |                        |                        | Cup          |                          |

| D3 | Makanan tambahan/<br>Dietary supplement                                                                           | Kekerapan pengambilan/ Frequency of intake     |                                                   |                                                   |                                                                   | Saiz sajian /serving size        | Jumlah sajian Setiap kali makan/<br><br>Total serving every meal |
|----|-------------------------------------------------------------------------------------------------------------------|------------------------------------------------|---------------------------------------------------|---------------------------------------------------|-------------------------------------------------------------------|----------------------------------|------------------------------------------------------------------|
|    |                                                                                                                   | Berapa kali sehari<br><br>How many times a day | Berapa kali seminggu<br><br>How many times a week | Berapa kali sebulan<br><br>How many times a month | Tidak pernah @ kurang dari sekali sebulan/ Never @ < once a month |                                  |                                                                  |
| a  | Minyak hati ikan cod<br>Cod liver oil<br>Jenama/brand: _____<br>Brp lama/how long: ____                           |                                                |                                                   |                                                   |                                                                   | Biji/pill<br>s.makan/<br>t.spoon |                                                                  |
| b  | Minyak ikan / Fish oil<br>Jenama/brand: _____<br>Brp lama/how long: ____                                          |                                                |                                                   |                                                   |                                                                   | Biji/pill<br>s.makan/<br>t.spoon |                                                                  |
| c  | New Obimin<br>Brp lama/how long: ____                                                                             |                                                |                                                   |                                                   |                                                                   | Biji/pill                        |                                                                  |
| d  | Obimin Plus<br>Brp lama/how long: ____                                                                            |                                                |                                                   |                                                   |                                                                   | Biji/pill                        |                                                                  |
| e  | Pramilet<br>Brp lama/how long: ____                                                                               |                                                |                                                   |                                                   |                                                                   | Biji/pill                        |                                                                  |
| f  | Iberet folic<br>Brp lama/how long: ____                                                                           |                                                |                                                   |                                                   |                                                                   | Biji/pill                        |                                                                  |
| g  | Vitamin D<br>Jenama/brand: _____<br>Brp lama/how long: ____                                                       |                                                |                                                   |                                                   |                                                                   | Biji/pill                        |                                                                  |
| h  | Multivitamin<br>Jenama/brand: _____<br>Brp lama/how long: ____                                                    |                                                |                                                   |                                                   |                                                                   | Biji/pill<br>s.makan/<br>t.spoon |                                                                  |
| i  | Kalsium dengan Vitamin D/<br>Calcium with vitamin D supplements<br>Jenama/brand: _____<br>Brp lama/how long: ____ |                                                |                                                   |                                                   |                                                                   | Biji/pill                        |                                                                  |
| j  | Kalsium tambahan<br>Calcium supplements<br>Jenama/brand: _____<br>Brp lama/how long: ____                         |                                                |                                                   |                                                   |                                                                   | Biji/pill                        |                                                                  |
| k  | Vitamin C                                                                                                         |                                                |                                                   |                                                   |                                                                   | Biji/pill                        |                                                                  |
| l  | Vitamin B kompleks                                                                                                |                                                |                                                   |                                                   |                                                                   | Biji/pill                        |                                                                  |
| m  | Asid folik/ Folic acid                                                                                            |                                                |                                                   |                                                   |                                                                   | Biji/pill                        |                                                                  |
| n  | Lain-lain/Others<br>Jenama/brand: _____                                                                           |                                                |                                                   |                                                   |                                                                   | Biji/pill<br>s.makan/            |                                                                  |

\* Senarai vitamin-vitamin yang sering diambil ketika hamil.
